# Supplementary material for: Sheath-flow probe electrospray ionization (sfPESI) mass spectrometry for the rapid forensic analysis of human body fluids
Source: Royal Society of Chemistry journal article supplement (doi:10.1039/c9ay00698b), 2019-01-01
Supplement: c9ay00698b1.pdf [file c9ay00698b1.pdf]

## Sheath-flow probe electrospray ionization (sfPESI) mass spectrometry for the rapid forensic analysis of human body fluids

Stephanie Rankin-Turner, Satoshi Ninomiya, James C. Reynolds and Kenzo Hiraoka

### Supplementary Information

**Tab. S1** Selected compounds of interest detected in urine, saliva and blood, with possible identifications based on accurate mass, molecular formulae, and characteristic fragment ions in comparison to previous literature and the Human Metabolome Database.

| Body Fluid | Possible Identification    | Molecular Formula                                                 | Experimental <i>m/z</i> | Theoretical <i>m/z</i> | ppm Error | Characteristic Fragment Ions |                       |
|------------|----------------------------|-------------------------------------------------------------------|-------------------------|------------------------|-----------|------------------------------|-----------------------|
| Urine      | Creatinine                 | C <sub>4</sub> H <sub>8</sub> N <sub>3</sub> O                    | 114.0666                | 114.0662               | 3.507     | 114, 86, 44                  |                       |
| Urine      | Urea                       | C <sub>2</sub> H <sub>9</sub> N <sub>4</sub> O <sub>2</sub>       | 121.0725                | 121.0720               | 4.130     | 121, 61, 44                  |                       |
| Urine      | 1-methylhistidine          | C <sub>7</sub> H <sub>12</sub> N <sub>3</sub> O                   | 2                       | 170.0931               | 170.0925  | 3.527                        | 170, 124, 109, 96, 83 |
| Urine      | Creatine                   | C <sub>4</sub> H <sub>10</sub> N <sub>3</sub> O                   | 2                       | 132.0772               | 132.0767  | 3.786                        | 132, 90, 72, 44       |
| Urine      | Proline betaine            | C <sub>7</sub> H <sub>14</sub> N <sub>2</sub> O                   | 144.1021                | 144.1019               | 1.388     | 144, 98, 84                  |                       |
| Urine      | Dibutylformamide           | C <sub>9</sub> H <sub>20</sub> NO                                 | 158.1546                | 158.1540               | 3.794     | 158, 116, 102                |                       |
| Urine      | Propionylcarnitine         | C <sub>10</sub> H <sub>20</sub> NO                                | 4                       | 218.1394               | 218.1387  | 3.209                        | 218, 144, 85          |
| Urine      | Isovalerylcarnitine        | C <sub>12</sub> H <sub>24</sub> NO                                | 4                       | 246.1704               | 246.1700  | 1.625                        | 246, 187, 85          |
| Urine      | Acetylcarnitine            | C <sub>9</sub> H <sub>18</sub> N <sub>2</sub> O                   | 204.1239                | 204.1231               | 3.919     | 204, 158, 145, 85, 60        |                       |
| Saliva     | 4-aminobutyric acid        | C <sub>4</sub> H <sub>10</sub> NO <sub>2</sub>                    | 104.0709                | 104.0707               | 1.922     | 104, 86, 69, 42              |                       |
| Saliva     | 5-aminopentanoic acid      | C <sub>5</sub> H <sub>12</sub> NO <sub>2</sub>                    | 118.0866                | 118.0863               | 2.541     | 118, 101, 100, 83, 59, 55    |                       |
| Saliva     | Methylimidazoleacetic acid | C <sub>6</sub> H <sub>9</sub> N <sub>2</sub> O <sub>2</sub>       | 141.0661                | 141.0659               | 1.418     | 141, 123, 95, 81             |                       |
| Saliva     | Proline                    | C <sub>5</sub> H <sub>10</sub> NO <sub>2</sub>                    | 116.071                 | 116.0707               | 2.585     | 116, 70                      |                       |
| Saliva     | Threonine                  | C <sub>4</sub> H <sub>10</sub> NO <sub>3</sub>                    | 120.0657                | 120.0656               | 0.833     | 120, 102, 56                 |                       |
| Saliva     | Phenylalanine              | C <sub>9</sub> H <sub>12</sub> NO <sub>2</sub>                    | 166.0869                | 166.0863               | 3.613     | 166, 120, 103                |                       |
| Blood      | Glucose                    | C <sub>6</sub> H <sub>12</sub> O <sub>6</sub> N                   | a                       | 203.0535               | 203.0527  | 3.940                        | 203, 188              |
| Blood      | C16:1 Sphingomyelin        | C <sub>39</sub> H <sub>79</sub> N <sub>2</sub> O <sub>6</sub> PNa | 725.5595                | 725.5568               | 3.721     | 725, 666, 542                |                       |
| Blood      | Cholesteryl linoleic acid  | C <sub>45</sub> H <sub>76</sub> O <sub>2</sub> Na                 | 671.5759                | 671.5738               | 3.127     | N/A*                         |                       |
| Blood      | 20:4 Cholesteryl ester     | C <sub>47</sub> H <sub>76</sub> O <sub>2</sub> Na                 | 695.5754                | 695.5730               | 3.450     | N/A*                         |                       |

NA\* In some instances fragment ions could be not observed due to the low concentration of the analyte.

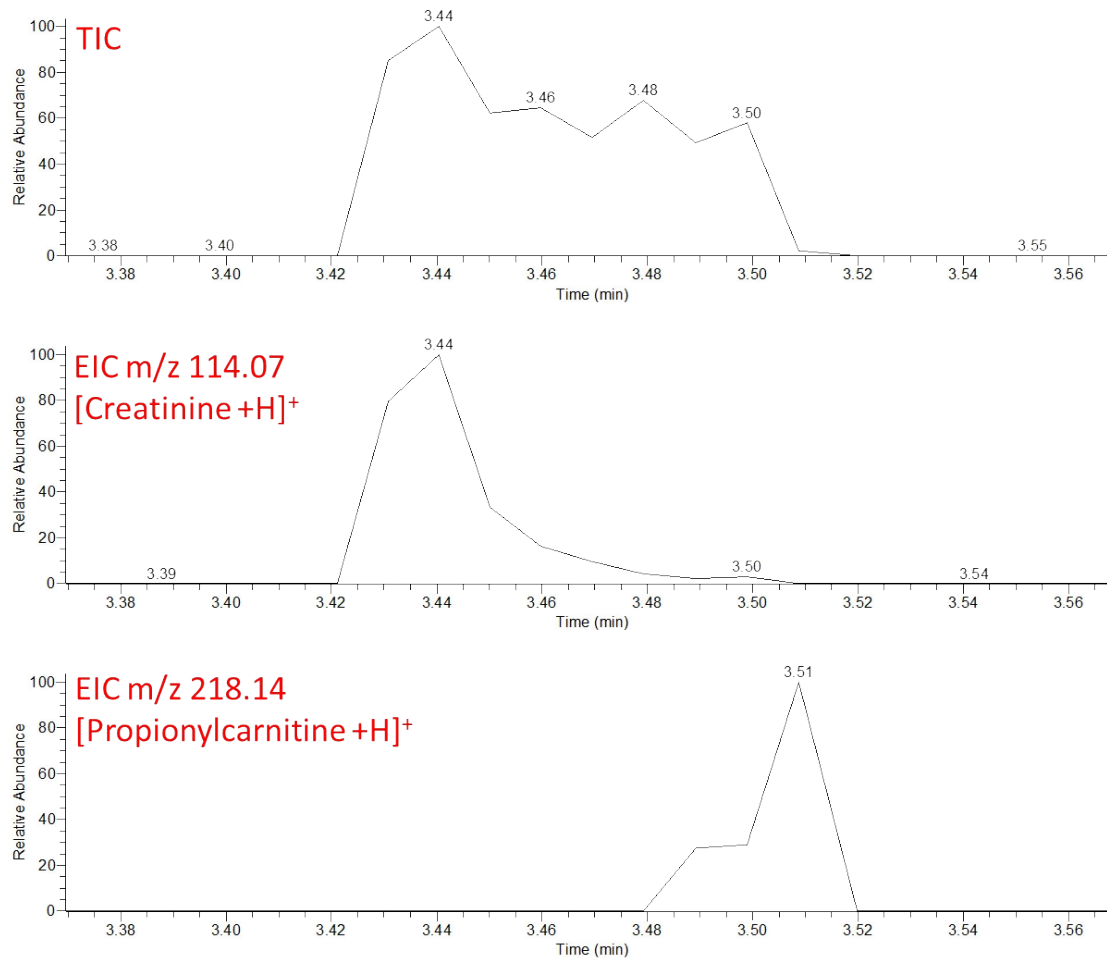

**Fig. S1** Extracted ion chromatogram (EIC) of creatinine and propionylcarnitine in comparison to the total ion chromatogram from fresh urine, demonstrating the change in the detection of these compounds throughout the electrospray.

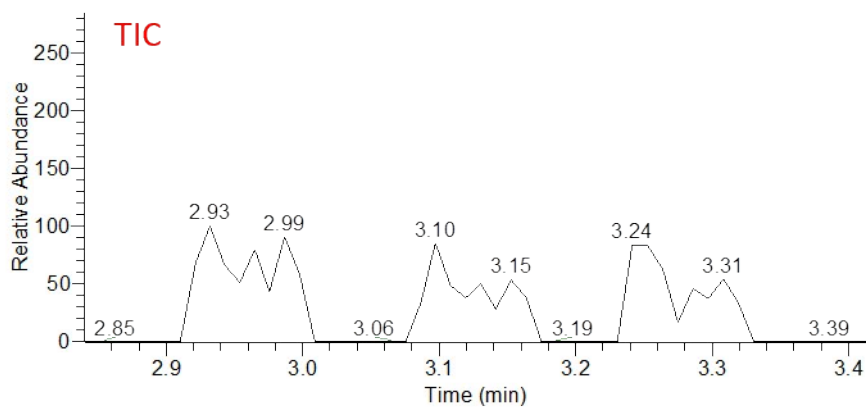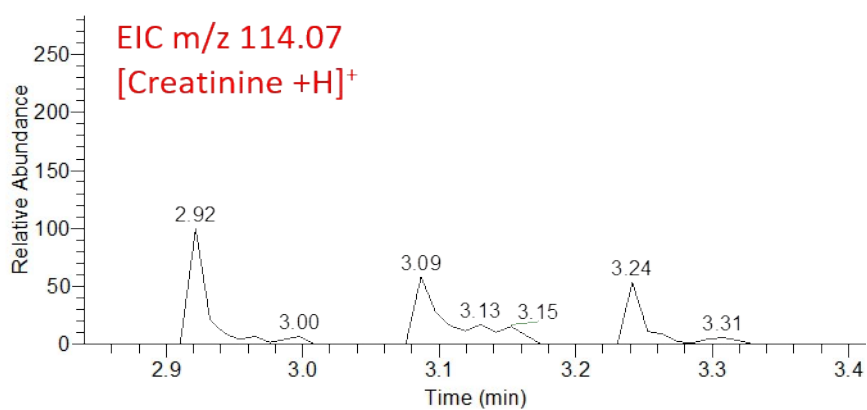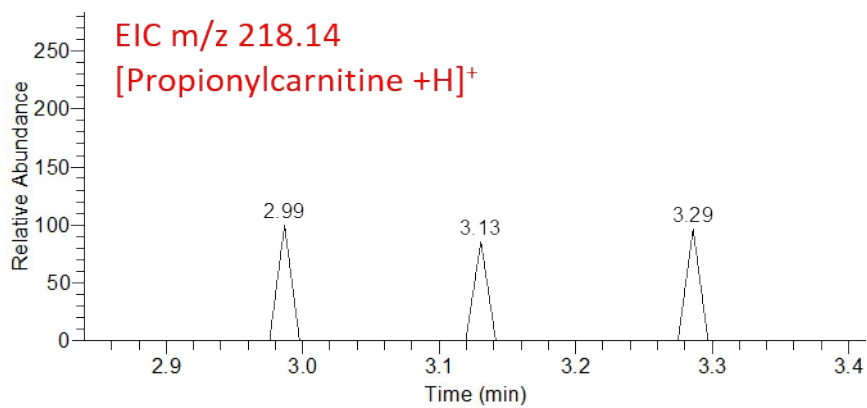

**Fig. S2** Repeated extracted ion chromatogram (EIC) of creatinine and propionylcarnitine, demonstrating the reproducibility of the sequential ionisation effect (%RSD of creatinine = 29.3% and %RSD of Propionylcarnitine = 8.3%).

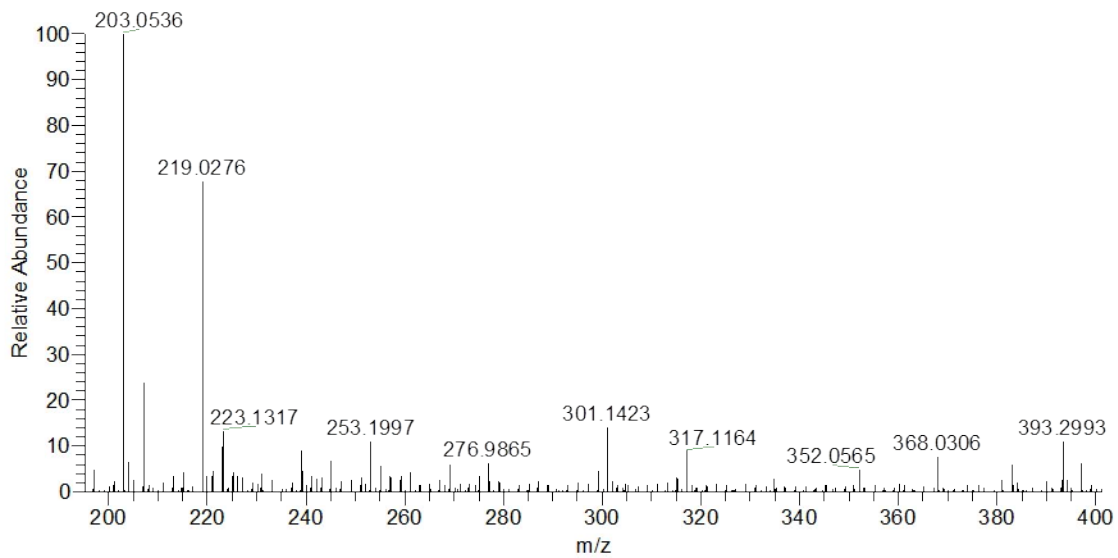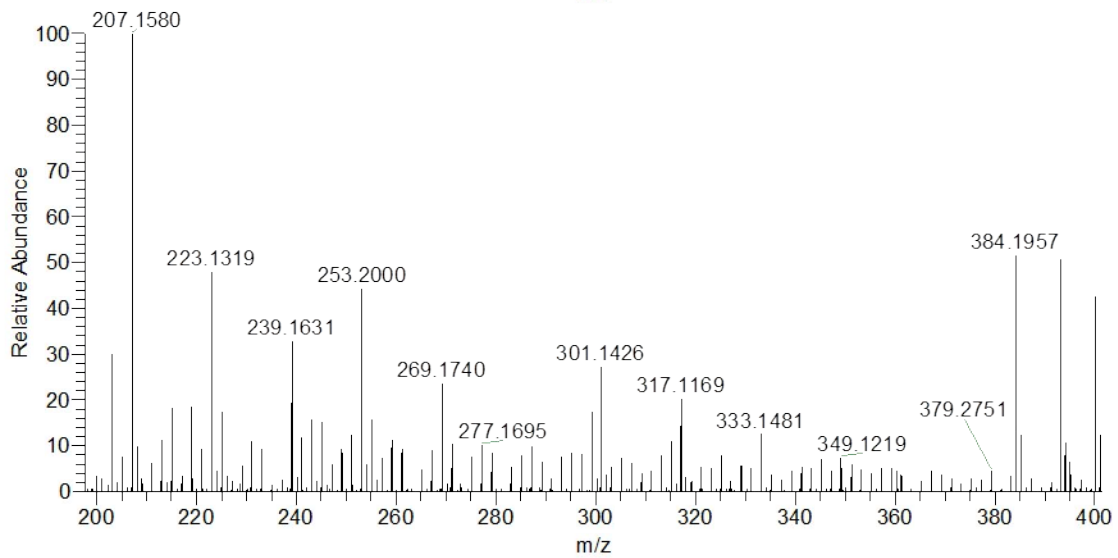

**Fig. S3** Mass spectra of fresh (above) and one month old (below) blood on glass slides, demonstrating chemical changes observed over time.

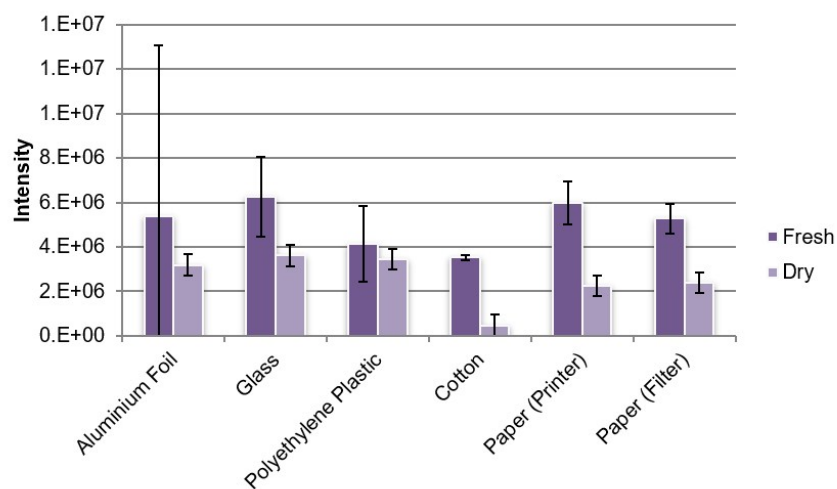

**Fig. S4** Sodiated fructose/glucose signal intensity in fresh and dried blood spots analysed on a range of surface materials

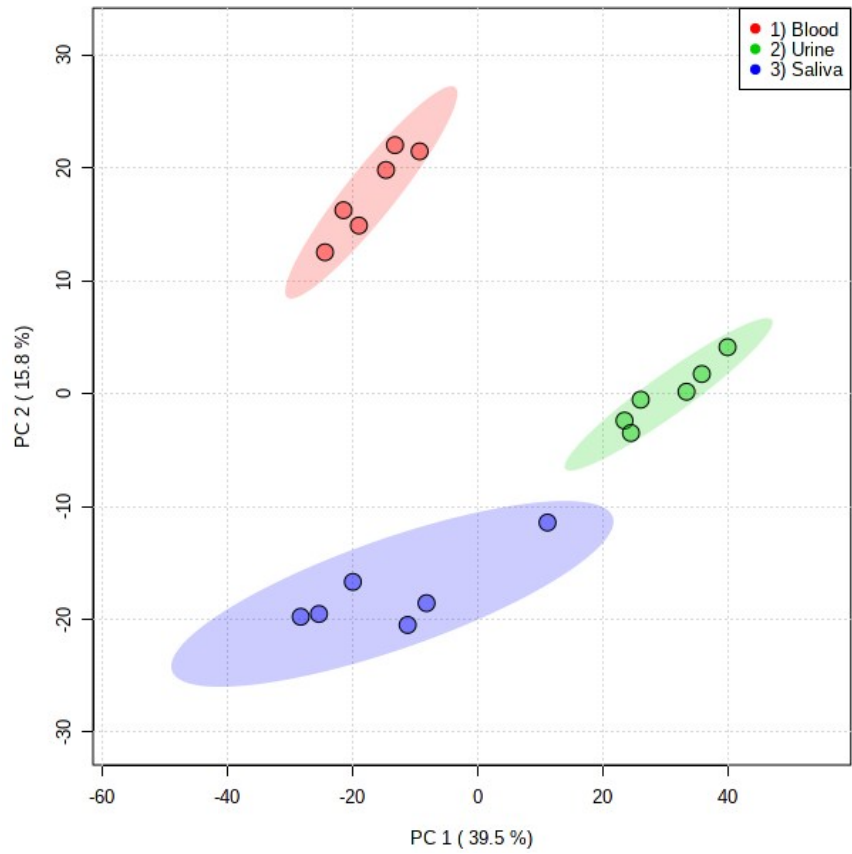

**Fig. S5** Principal component analysis scores plot of fresh blood, saliva and urine sampled from glass slides, with log transformation and Pareto scaling. Ellipses depict 95% confidence regions.
